1 **Depressive symptoms are associated with cigarette smoking among tuberculosis patients in**

2 **Botswana**

3

4 Alexandria Jones-Patten MSN, RN. Sue & Bill Gross School of Nursing, University of

5 California Irvine, Irvine, CA, USA;

6 Qiao Wang MPH: Fielding School of Public Health, University of California Los Angeles, Los

7 Angeles, CA, USA;

8 Keneilwe Molebatsi. Department of Psychiatry, Faculty of Medicine, University of Botswana,

9 Gaborone, Botswana;

10 Thomas E. Novotny MD, MPH: School of Public Health, San Diego State University, San

11 Diego, CA, USA;

12 Kamran Siddiqi MBBS, MRCP, MPH, FFPH, PhD. Department of Health Sciences, University

13 of York, York, England;

14 Chawangwa Modongo: Victus Global Botswana Organisation, Gaborone, Botswana;

15 Nicola M. Zetola MD, MPH: Victus Global Botswana Organisation, Gaborone, Botswana;

16 Bontle Mbongwe, PhD: Department of Environmental Health, Faculty of Health Sciences,

17 University of Botswana, Gaborone, Botswana;

18 Sanghyuk S. Shin PhD. Sue & Bill Gross School of Nursing, University of California Irvine,

19 Irvine, CA, USA.

20

21

22

23

24 **Corresponding Author:**

25 Sanghyuk S. Shin, PhD

26 Associate Professor, Sue & Bill Gross School of Nursing

27 Director, UCI Infectious Disease Science Initiative

28 University of California Irvine

29 106F Berk Hall

30 Irvine, CA 92697

31 [sshin2@uci.edu](mailto:sshin2@uci.edu)

32 Tel: 949-576-8675

33

34

35 **Acknowledgements**

36 We would like to thank study participants for their time and efforts. We would also like to thank

37 University of California, Irvine and Botswana Ministry of Health and Wellness Human Research

38 Development Committee. Dr. Siddiqi was funded by Medical Research Council (UK) from TB

39 Multimorbidity Grant (Ref No: MC\_PC\_MR/T037806/1).

40

41 **Conflict of Interest Declaration**

42 All authors declare we have no conflict of interest.

43

44

45 **Abstract**

46 Background: Researchers have increasingly recognized the adverse effects of smoking on  
47 tuberculosis (TB) outcomes. Smoking may be a maladaptive coping mechanism for depression  
48 and anxiety among TB patients; however, this association has not yet been investigated.

49  
50 Design/Methods: We conducted a cross-sectional study among newly diagnosed TB patients  
51 between January and December 2019 in Gaborone, Botswana, and evaluated factors associated  
52 with cigarette smoking. Using the Patient Health Questionnaire-9 and the Zung Self-Rating  
53 Anxiety scale, we collected depression and anxiety scores, respectively; scores of  $\geq 10$  indicate  
54 depression and scores of  $\geq 36$  indicate anxiety. We performed Poisson regression analyses with  
55 robust variance to examine whether depression and anxiety were associated with smoking.

56  
57 Results: One hundred and eighty participants with TB were enrolled from primary health clinics.  
58 Among all enrollees, depression was reported in 46 (27.1%) participants, while anxiety was  
59 reported in 60 (44.4%) participants. Overall, 45 (25.0%) participants reported current smoking,  
60 and the median number of cigarettes per day was 10. Depressive symptoms were associated with  
61 a higher prevalence of smoking (aPR: 1.82; 95% CI = 1.11, 3.01) after adjusting for sex, HIV  
62 status, food insecurity, anxiety, and income. The association between anxiety symptoms and  
63 cigarette smoking did not reach statistical significance (aPR 1.26; 95% CI: 0.78-2.05).

64  
65 Conclusions: We found the association between depressive symptoms and smoking among TB  
66 patients in Botswana to be significant and the association between anxiety symptoms and

67 cigarette smoking insignificant. Future studies should further investigate these associations when  
68 addressing TB care.

69

70 **Key words (4-6):** Depression, cigarette smoking cessation, tuberculosis, Botswana

71

72

73 **Association between depressive symptoms and cigarette smoking among tuberculosis**

74 **patients in Botswana.**

75

76 Introduction

77 An estimated 1.4 million people died from tuberculosis (TB) globally in 2019; it is one of  
78 the top ten global causes of death worldwide [1]. Tobacco smoking is associated with an  
79 increased risk of TB infection and TB disease [2]. Research suggests smoking is associated with  
80 more extensive lung disease at time of TB diagnosis [3], higher rates of TB infection [4], and  
81 higher rates of TB treatment failures [5]. Despite evidence showing these harmful links between  
82 smoking and TB, the World Health Organization [6] estimates that 1.3 billion people use tobacco  
83 globally, and more than 80% of smokers live in low- and middle-income countries [7]. In  
84 Botswana, an upper middle-income country, 18% of adults use tobacco and 14.2% of adults  
85 smoke tobacco [8]. Further, depression is reportedly higher in TB patients than the general  
86 population [9]. Studies suggest an association between depression and smoking [10-12] as well  
87 as between anxiety and smoking [13, 14]; however, to our knowledge, these associations have  
88 not been studied in TB-infected populations. With both smoking and depression being more  
89 common in people with TB than in the general population [15], their association may be even  
90 stronger with potential adverse effects on patient outcomes. This study explores the association

91 between smoking and common mental health issues among TB patients, including depression  
92 and anxiety.

93

94 Methods

95 Study Design, Population and Site Description

96 The methods for this study of TB patients have been described in detail elsewhere [16,  
97 17]. Briefly, in an effort to explore the association between depression, anxiety and cigarette  
98 smoking in TB patients, this cross-sectional study was conducted from January to December,  
99 2019 at 12 primary health care facilities in Gaborone, Botswana. Participants were eligible for  
100 inclusion if they were at least 18 years of age and older, with a microbiologically confirmed TB  
101 diagnosis, and were recruited by our research staff at the time of receiving TB diagnosis. All  
102 patients diagnosed with TB at the participating facilities were consecutively enrolled for this  
103 study. All TB patients regardless of disease site and drug susceptibility status were eligible.

104

105 Measures

106 The primary outcome variable was smoking status. For analysis of smoking habits,  
107 participants were asked, “Are you a current smoker?” Current smoking was self-reported by  
108 participants, in which case participants were categorized into two groups: smokers and non-  
109 smokers. The independent variables were depression and anxiety. Depressive symptoms were  
110 assessed using the Patient Health Questionnaire-9. This nine-item instrument analyzes frequency  
111 of depressive symptoms up to two weeks prior to taking the questionnaire, using a 4-point Likert  
112 scale. Scores of 10 or higher indicate depressive symptoms [18]. The internal reliability of the  
113 Patient Health Questionnaire-9 in the current study was acceptable, with a Cronbach’s alpha of

114 0.74. This instrument has been validated in primary care clinic settings [18]. The Zung Self-  
115 Rating Anxiety Scale is a 20-item self-rating instrument which assesses cognitive, autonomic,  
116 motor and central nervous system symptoms of anxiety using a 4-point Likert-type scale ranging  
117 from ‘a little of the time,’ ‘some of the time,’ ‘good part of the time,’ and ‘most of the time’ [19].  
118 Scores of 36 or higher on the Zung scale was indicative of anxiety symptoms. The Zung scale  
119 demonstrated acceptable internal reliability with a Cronbach’s alpha of 0.80 in this study.

120

121 We also administered a questionnaire to collect data on age, sex, income, education,  
122 employment status, history of alcohol use, and smoking status. Clinical information collected  
123 included TB diagnosis, TB symptoms and their duration, HIV status and antiretroviral treatment  
124 history, and CD4 counts (from the national HIV database for HIV-infected participants).  
125 Rifampin-resistant results from Xpert MTB/RIF were available for some participants.

126

127 Food insecurity was evaluated by the Household Food Insecurity Access Scale. This  
128 nine-item questionnaire distinguishes food-insecure households and determines the degree of  
129 food insecurity using a Likert-type scale that ranged from ‘never’, ‘rarely (1 or 2 times)’,  
130 ‘sometimes (3–10 times)’, and ‘often (more than 10 times)’.

131

## 132 Data Collection

133 Potential participants were identified first from the lab and clinic register and were  
134 approached for recruitment by Research Assistants, who then screened them for eligibility and  
135 obtained informed consent. The Research Assistants read consent materials in English and/or  
136 Setswana (official languages in Botswana) to patients who were illiterate; all participants verified

137 their consent to participate by signature. Data on socioeconomic, demographic characteristics  
138 and clinical information were collected in one-time interviews using the standardized  
139 questionnaires described above, prepared in both English and Setswana.

140

141 Participants whose total depressive symptom score corresponded with mild depression  
142 (score 5-9) were given a contact sheet for psychiatric services to seek help if symptoms  
143 worsened or persisted. Research Assistants helped make appointments for participants scoring a  
144 10 or higher on the Patient Health Questionnaire-9 or those presenting with suicidal ideation.  
145 This study was approved by the Institutional Review Board of the University of California,  
146 Irvine and Botswana Ministry of Health Human Research Development Committee.

147

#### 148 Statistical Analysis

149 We investigated whether depression or anxiety was associated with the primary outcome  
150 of interest, smoking status, in people with TB. Participants were categorized into two exposure  
151 groups: current smokers and non-smokers. Participants were identified as experiencing  
152 depressive and anxiety symptoms if they scored  $\geq 10$  on Patient Health Questionnaire-9 and  $\geq 36$   
153 on the Zung scale, respectively. To control for potential confounding, participants were  
154 categorized as experiencing ‘food security or mild insecurity’ or ‘moderate to severe insecurity  
155 [20]. We also dichotomized participants into having “no monthly income” and “some income,”  
156 and having “no education” and “some education,” as the variation between these categories was  
157 minimal. We examined the bivariate associations of current smoking with age, education, sex,  
158 monthly income, HIV status, food insecurity, anxiety, and depression. Poisson regression  
159 modeling with robust variance was used to estimate prevalence ratios (PRs) and 95% confidence

160 intervals (95% CI) for bivariate and multivariable analysis with current smoking status specified  
161 as the outcome variable [21, 22]. The multivariate Poisson regression model assessed the  
162 association between mental health disorders and current smoking status adjusting for sex,  
163 income, HIV status, and food insecurity. A sensitivity analysis was also conducted; the analysis  
164 was restricted to men only as there were very few women identifying as smokers. We also  
165 conducted a sensitivity analysis to assess whether alcohol consumption would confound our  
166 results. Data were analyzed using SAS version 9.4 (SAS Institute, Cary, North Carolina, U.S.).

167

## 168 Results

169 A total of 180 participants were included in the study; the majority were male (64.4%,  
170 n=116), and the mean age was 37 years. Among all enrollees, depression was reported in 46  
171 (27.1%) participants, while anxiety was reported in 60 (44.4%) participants. One quarter (n=45)  
172 of participants identified as smokers. Smokers were more likely to be male (91.1%, n=41), and  
173 smoked a median of ten cigarettes per day (67%, n=30). Compared to non-smokers, current  
174 smokers were more likely to report depressive symptoms (PHQ-9  $\geq 10$ : 40.0% vs. 21.5%) and  
175 anxiety symptoms (Zung  $\geq 36$ : 55.6% vs. 44.4%). Moderate to severe food insecurity was also  
176 reported more in smokers than non-smokers (48.9% vs. 34.8%), as was alcohol use (100% vs.  
177 25.2%) respectively (Table 1).

178

179 In the unadjusted model, we found female participants were less likely than male  
180 participants to be current smokers (cPR: 0.18; 95% CI: 0.07-0.47). Having income (cPR: 1.98;  
181 95% CI: 1.05-3.73) and depressive symptoms (cPR:1.89; 95% CI: 1.15-3.10) were more likely to  
182 be associated with current smoking (Table 2). After adjusting for HIV co-infection, income,



183 anxiety symptoms, and food insecurity, depressive symptoms (aPR: 1.82; 95% CI: 1.11-3.01)  
184 and male sex (aPR: 0.18; 95% CI: 0.07-0.48) remained to be significantly associated with current  
185 smoking (Table 2). Depression (aPR: 1.09; 95% CI: 1.03-1.15) and income (aPR: 2.15; 95% CI:  
186 1.02-4.53), were each positively associated with smoking intensity. Compared to men, women  
187 demonstrated lower smoking intensity (aPR: 0.18; 95% CI: 0.07-0.48). In our sensitivity  
188 analyses, we found similar results for male participants only, (aPR: 2.22, 95%CI: 1.41-3.48), and  
189 a reduced level of association among alcohol consumers only (aPR: 1.44, 95% CI: 1.00-2.07) for  
190 the association between depression and smoking. The association between anxiety symptoms and  
191 cigarette smoking did not reach statistical significance (aPR 1.26; 95% CI: 0.78-2.05).

192

## 193 Discussion

194 In this study, depression was associated with current smoking among TB patients after  
195 adjusting for potential confounders. Additionally, we found that men were more likely to engage  
196 in smoking than women in this study. Patients with TB have reported both depression [23, 24]  
197 and smoking during treatment of TB [3, 25], with both potentially leading to reduced treatment  
198 success. In addition to the hypothesis that this relationship could be bidirectional, another  
199 hypothesis for the association between depression and smoking is the desire to self-medicate  
200 [26]. Nicotine causes the release of dopamine; when smoking stops, depressed mood can occur  
201 as a result of nicotine withdrawal [27]. The negative effect of depression may be enhanced  
202 among people with TB, as treatment for TB can take a minimum of six to nine months. Our  
203 findings suggest that current efforts to help TB patients quit smoking may benefit from the  
204 management of multi-morbidity, including mental health and smoking cessation counseling.

205           The findings of this study should be considered with several limitations. First, these data  
206 are from a cross-sectional study, leaving the direction of causality between smoking and  
207 depression unclear. However, other studies show consistent associations between depression and  
208 smoking [28, 29]. Given the high proportion of smoking and depression among TB patients, a  
209 more consistent approach would be addressing the multi-morbidities of smoking and depression  
210 in TB treatment programs. Additionally, data about recent quit attempts was not collected. It is  
211 possible people recently diagnosed with TB could have quit smoking upon learning of their TB  
212 diagnosis and therefore classified as non-smokers. Further, because we used a convenience  
213 sample in Botswana for this study, our results may not be generalizable to other TB populations.  
214 Finally, some data collected in our study were based on self-report (anxiety scores, smoking  
215 status), which may lead to misclassification of variables included in our model. However,  
216 research staff were trained to minimize this bias via objective interview techniques; for questions  
217 related to mental health disorders, participants were able to directly record their answers on the  
218 questionnaire.

219

## 220 Conclusion

221           This study expands our understanding of the association between depression and smoking  
222 status among TB patients in Botswana. Additionally, this study adds evidence to the need for  
223 specific public health efforts including smoking cessation interventions as part of TB treatment  
224 programs. Previous programs have evaluated smoking cessation as part of the core treatment  
225 program for people with TB [30], and should be considered in future TB treatment programs.  
226 Mental health screenings should also be included in treatment of TB to provide person-centered  
227 care among these higher risk patients and further develop treatment plans for patients with TB

228 multimorbidity. Future studies should employ larger sample size in different settings to validate  
229 our findings. Additionally, future research should review the course of depression and anxiety  
230 and its association with smoking cessation during TB treatment [31].

231

232

233 Statements

234 Informed Consent

235 Informed consent was obtained from all individual participants included in the study.

236

237 Ethical Approval

238 All procedures performed in studies involving human participants were in accordance with the  
239 ethical standards of the institutional and national research committee and with the 1964 Helsinki  
240 declaration and its later amendments or comparable ethical standards. This study was approved  
241 by the UCI IRB and the Botswana Ministry of Health Human Research Development Program.

242

243 Welfare of Animals

244 This article does not contain any studies with animals performed by any of the authors.

245

246

247

248

249

250

251

252 **Table 1. Characteristics of study participants in Gaborone, Botswana, 2019 (n=180)**  
 253

| Characteristic                         |                            | Non smoker<br>n/N (%) or median<br>(IQR) | Smoker<br>n/N (%) or median<br>(IQR) |
|----------------------------------------|----------------------------|------------------------------------------|--------------------------------------|
| Overall                                |                            | 135/180 (75.0)                           | 45/180 (25.0)                        |
| Age (in years)                         |                            | 36.0 (27.0-46.0)                         | 39.0 (30.0-43.0)                     |
| Number of cigarettes<br>smoked per day |                            | NA                                       | 10.0 (5.0-20.0)                      |
| HIV                                    | Negative                   | 60/135 (44.4)                            | 21/45 (46.7)                         |
|                                        | Positive                   | 75/135 (55.6)                            | 24/45 (53.3)                         |
| Food insecurity                        | None or mildly<br>insecure | 88/135 (65.2)                            | 23/45 (51.1)                         |
|                                        | Moderate to<br>severe      | 47/135 (34.8)                            | 22/45 (48.9)                         |
| Depression                             | No                         | 106/135 (78.5)                           | 27/45 (60.0)                         |
|                                        | Yes                        | 29/135 (21.5)                            | 18/45 (40.0)                         |
| Anxiety                                | No                         | 75/135 (55.6)                            | 20/45 (44.4)                         |
|                                        | Yes                        | 60/135 (44.4)                            | 25/45 (55.6)                         |
| Education                              | No                         | 12/135 (8.9)                             | 5/45 (11.1)                          |
|                                        | Yes                        | 123/135 (91.1)                           | 40/45 (88.9)                         |
| Income                                 | No                         | 55/135 (40.7)                            | 10/45 (22.2)                         |
|                                        | Yes                        | 80/135 (59.3)                            | 35/45 (77.8)                         |
| Gender                                 | Male                       | 75/135 (55.6)                            | 41/45 (91.1)                         |
|                                        | Female                     | 60/135 (44.4)                            | 4/45 (8.9)                           |
| Alcohol                                | No                         | 101/135 (74.8)                           | 0                                    |
|                                        | Yes                        | 34/135 (25.2)                            | 45/45 (100.0)                        |
| CD4* (cells/mm <sup>3</sup> )          | ≤ 200                      | 23/75 (30.7)                             | 7/24 (29.2)                          |
|                                        | > 200                      | 40/75 (53.3)                             | 15/24 (62.5)                         |
|                                        | Missing                    | 12/75 (16.0)                             | 2/24 (8.3)                           |
| ART*                                   | Never taken<br>ART         | 25/75 (33.3)                             | 6/24 (25.0)                          |
|                                        | Taking ART                 | 45/75 (60.0)                             | 14/24 (58.3)                         |
|                                        | Took ART but<br>stopped    | 5/75 (6.7)                               | 4/24 (16.7)                          |

254 Abbreviations: IQR=Interquartile range; ART=Antiretroviral therapy

255 \*Among HIV-positive patients only (n = 99)

256

257

258 **Table 2. Correlates of current smoking (n=180)**

259

| Characteristic  |                         | Crude PR<br>(95% CI)    | Adjusted PR<br>(95% CI) |
|-----------------|-------------------------|-------------------------|-------------------------|
| HIV             | Negative                | 1.00                    | 1.00                    |
|                 | Positive                | 0.94 (0.56-1.55)        | 0.87 (0.54-1.39)        |
| Food insecurity | None or mildly insecure | 1.00                    | 1.00                    |
|                 | Moderate to severe      | 1.54 (0.93-2.54)        | 1.43 (0.85-2.40)        |
| Depression      | No                      | 1.00                    | 1.00                    |
|                 | Yes                     | <b>1.89 (1.15-3.10)</b> | <b>1.82 (1.11-3.01)</b> |
| Anxiety         | No                      | 1.00                    | 1.00                    |
|                 | Yes                     | 1.40 (0.84-2.33)        | 1.26 (0.78-2.05)        |
| Education       | No                      | 1.00                    | Not included            |
|                 | Yes                     | 0.83 (0.38-1.83)        |                         |
| Income          | No                      | 1.00                    | 1.00                    |
|                 | Yes                     | <b>1.98 (1.05-3.73)</b> | 1.67 (0.92-3.04)        |
| Gender          | Male                    | 1.00                    | 1.00                    |
|                 | Female                  | <b>0.18 (0.07-0.47)</b> | <b>0.18 (0.07-0.48)</b> |
| Age             |                         | 1.00 (0.99-1.02)        | Not included            |

260 Abbreviations: PR=Prevalence ratio; CI=Confidence interval

261

262

263

264

265

266

267

268

269

270

271

272

273

274

275

276

277

278

279

280

## 281   **References**

- 282   1. World Health Organization. Tuberculosis 2020 [Available from: [https://www.who.int/news-](https://www.who.int/news-room/fact-sheets/detail/tuberculosis)  
283    [room/fact-sheets/detail/tuberculosis](https://www.who.int/news-room/fact-sheets/detail/tuberculosis)].
- 284   2. Lin HH, Ezzati M, Murray M. Tobacco smoke, indoor air pollution and tuberculosis: a  
285    systematic review and meta-analysis. *PLoS Med*. 2007;4(1):e20.
- 286   3. Leung CC, Yew WW, Chan CK, Chang KC, Law WS, Lee SN, et al. Smoking adversely  
287    affects treatment response, outcome and relapse in tuberculosis. *Eur Respir J*.  
288    2015;45(3):738-45.
- 289   4. Alavi-Naini R, Sharifi-Mood B, Metanat M. Association between tuberculosis and smoking.  
290    *Int J High Risk Behav Addict*. 2012;1(2):71-4.
- 291   5. Mahishale V, Patil B, Lolly M, Eti A, Khan S. Prevalence of Smoking and Its Impact on  
292    Treatment Outcomes in Newly Diagnosed Pulmonary Tuberculosis Patients: A Hospital-  
293    Based Prospective Study. *Chonnam Med J*. 2015;51(2):86-90.
- 294   6. World. Health Organization. WHO Report on the global tobacco epidemic 2019: Offer help to  
295    quit tobacco use 2019 [Available from: [https://www.who.int/teams/health-](https://www.who.int/teams/health-promotion/tobacco-control/who-report-on-the-global-tobacco-epidemic-2019)  
296    [promotion/tobacco-control/who-report-on-the-global-tobacco-epidemic-2019](https://www.who.int/teams/health-promotion/tobacco-control/who-report-on-the-global-tobacco-epidemic-2019)].
- 297   7. World Health Organization. Tobacco 2020 [Available from: [https://www.who.int/health-](https://www.who.int/health-topics/tobacco#tab=tab_2)  
298    [topics/tobacco#tab=tab\\_2](https://www.who.int/health-topics/tobacco#tab=tab_2)].
- 299   8. Republic of Botswana WHOCfDCP. GLOBAL ADULT TOBACCO SURVEY. 2018.
- 300   9. Duko B, Bedaso A, Ayano G. The prevalence of depression among patients with tuberculosis:  
301    a systematic review and meta-analysis. *Annals of general psychiatry*. 2020;19(1):30.
- 302   10. Ojo-Fati O, Thomas JL, Vogel RI, Ogedegbe O, Jean-Louis G, Okuyemi KS. Predictors of  
303    Adherence to Nicotine Replacement Therapy (Nicotine Patch) Among Homeless Persons  
304    Enrolled in a Randomized Controlled Trial Targeting Smoking Cessation. *J Fam Med*.  
305    2016;3(7).
- 306   11. Harris T, Winetrobe H, Rhoades H, Wenzel S. The Role of Mental Health and Substance Use  
307    in Homeless Adults' Tobacco Use and Cessation Attempts. *J Dual Diagn*. 2019;15(2):76-  
308    87.
- 309   12. Weinberger AH, Kashan RS, Shpigel DM, Esan H, Taha F, Lee CJ, et al. Depression and  
310    cigarette smoking behavior: A critical review of population-based studies. *Am J Drug*  
311    *Alcohol Abuse*. 2017;43(4):416-31.
- 312   13. Stanton R, To QG, Khalesi S, Williams SL, Alley SJ, Thwaite TL, et al. Depression, Anxiety  
313    and Stress during COVID-19: Associations with Changes in Physical Activity, Sleep,  
314    Tobacco and Alcohol Use in Australian Adults. *Int J Environ Res Public Health*.  
315    2020;17(11).
- 316   14. Zvolensky MJ, Bakhshaie J, Norton PJ, Smits JAJ, Buckner JD, Garey L, et al. Visceral  
317    sensitivity, anxiety, and smoking among treatment-seeking smokers. *Addict Behav*.  
318    2017;75:1-6.
- 319   15. Marshall AM, Barua D, Mitchell A, Keding A, Huque R, Khan A, et al. Smoking prevalence  
320    among tuberculosis patients: A cross-sectional study in Bangladesh and Pakistan. *Tob*  
321    *Induc Dis*. 2020;18:70.
- 322   16. Molebatsi K, Wang Q, Dima M, Ho-Foster A, Modongo C, Zetola N, et al. Depression and  
323    delayed tuberculosis treatment initiation among newly diagnosed patients in Botswana.  
324    *Glob Public Health*. 2020:1-11.

- 325 17. Wang Q, Dima M, Ho-Foster A, Molebatsi K, Modongo C, Zetola NM, et al. The association  
326 of household food insecurity and HIV infection with common mental disorders among  
327 newly diagnosed tuberculosis patients in Botswana. *Public Health Nutr.* 2020;1-9.
- 328 18. Kroenke K, Spitzer RL, Williams JB. The PHQ-9: validity of a brief depression severity  
329 measure. *J Gen Intern Med.* 2001;16(9):606-13.
- 330 19. Zung WW. A rating instrument for anxiety disorders. *Psychosomatics.* 1971;12(6):371.
- 331 20. Maxwell D, Coates J, Vaitla B, Maxwell D. How Do Different Indicators of Household Food  
332 Security Compare? Empirical Evidence from Tigray 2013.
- 333 21. Greenland S. Model-based Estimation of Relative Risks and Other Epidemiologic Measures  
334 in Studies of Common Outcomes and in Case-Control Studies. *Am J Epidemiol.*  
335 2004;160(4):301-5.
- 336 22. Zou G. A modified poisson regression approach to prospective studies with binary data. *Am J*  
337 *Epidemiol.* 2004;159(7):702-6.
- 338 23. Amreen, Nbsp, Rizvi N. Frequency of Depression and Anxiety among Tuberculosis Patients.  
339 *Journal of Tuberculosis Research.* 2016;04(04):183-90.
- 340 24. Shrestha P, Subba UK, Brouwer M, Sweetland AC. Depression among TB patients and  
341 associated factors in Kathmandu Valley, Nepal. *Glob Ment Health (Camb).* 2020;7:e4.
- 342 25. Altet N, Latorre I, Jiménez - Fuentes MÁ, Maldonado J, Molina I, González - Díaz Y, et al.  
343 Assessment of the influence of direct tobacco smoke on infection and active TB  
344 management. info:eu-repo/grantAgreement/ISCIII/PI 13/01546.
- 345 26. Fluharty M, Taylor AE, Grabski M, Munafò MR. The Association of Cigarette Smoking  
346 With Depression and Anxiety: A Systematic Review. *Nicotine Tob Res.* 2017;19(1):3-13.
- 347 27. Benowitz NL. Pharmacology of nicotine: addiction, smoking-induced disease, and  
348 therapeutics. *Annu Rev Pharmacol Toxicol.* 2009;49:57-71.
- 349 28. Ellis EM, Orom H, Giovino GA, Kiviniemi MT. Relations between negative affect and  
350 health behaviors by race/ethnicity: Differential effects for symptoms of depression and  
351 anxiety. *Health Psychol.* 2015;34(9):966-9.
- 352 29. Stubbs B, Vancampfort D, Firth J, Solmi M, Siddiqi N, Smith L, et al. Association between  
353 depression and smoking: A global perspective from 48 low- and middle-income  
354 countries. *J Psychiatr Res.* 2018;103:142-9.
- 355 30. Siddiqi K, Khan A, Ahmad M, Dogar O, Kanaan M, Newell JN, et al. Action to stop  
356 smoking in suspected tuberculosis (ASSIST) in Pakistan: a cluster randomized,  
357 controlled trial. *Ann Intern Med.* 2013;158(9):667-75.
- 358 31. Siddiqi K, Lin Y, Elsey H, Siddiqi N. TB multimorbidity: a global health challenge  
359 demanding urgent attention. *International Journal of Tuberculosis & Lung Disease.*  
360 2021;25(2):87-90.

361  
362
